# Supplementary material
Source: publisher figshare collection journal article supplement (https://tandf.figshare.com/ndownloader/files/16107857)
Supplement: Supplementary file 1 [file 16107857]

**Supplemental material**

Understanding how *Pochonia chlamydosporia* increases phosphorus availability

Angélica de Souza Gouveia1, Thalita Suelen Avelar Monteiro2, Samuel Vasconcelos Valadares3, Bruna Leite Sufiate4, Leandro Grassi de Freitas2, Humberto Josué de Oliveira Ramos1, José Humberto de Queiroz1.

¹ Departamento de Bioquímica e Biologia Molecular, Universidade Federal de Viçosa (UFV), CEP 36570-900, Minas Gerais, Brazil.

2 Departamento de Fitopatologia, Universidade Federal de Viçosa (UFV), CEP 36570-900, Minas Gerais, Brazil.

3 Departamento de Solos, Universidade Federal de Viçosa (UFV), CEP 36570-900, Minas Gerais, Brazil.

4 Polytechnic School, Universidade Federal da Bahia (UFOB), CEP 40210-630, Salvador, Brazil.


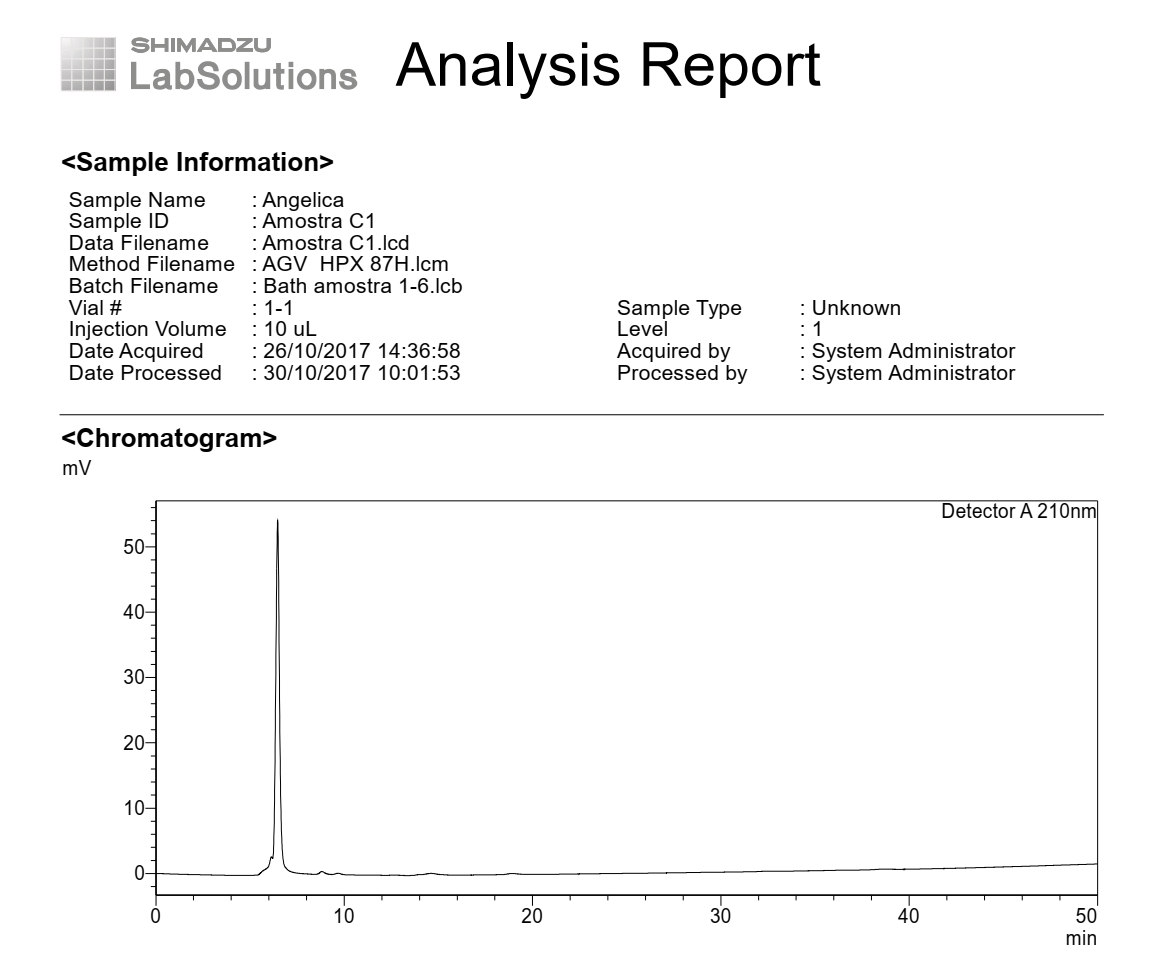


Figure S1: Chromatogram refers to the control, only culture medium. Organic acids was not detected.


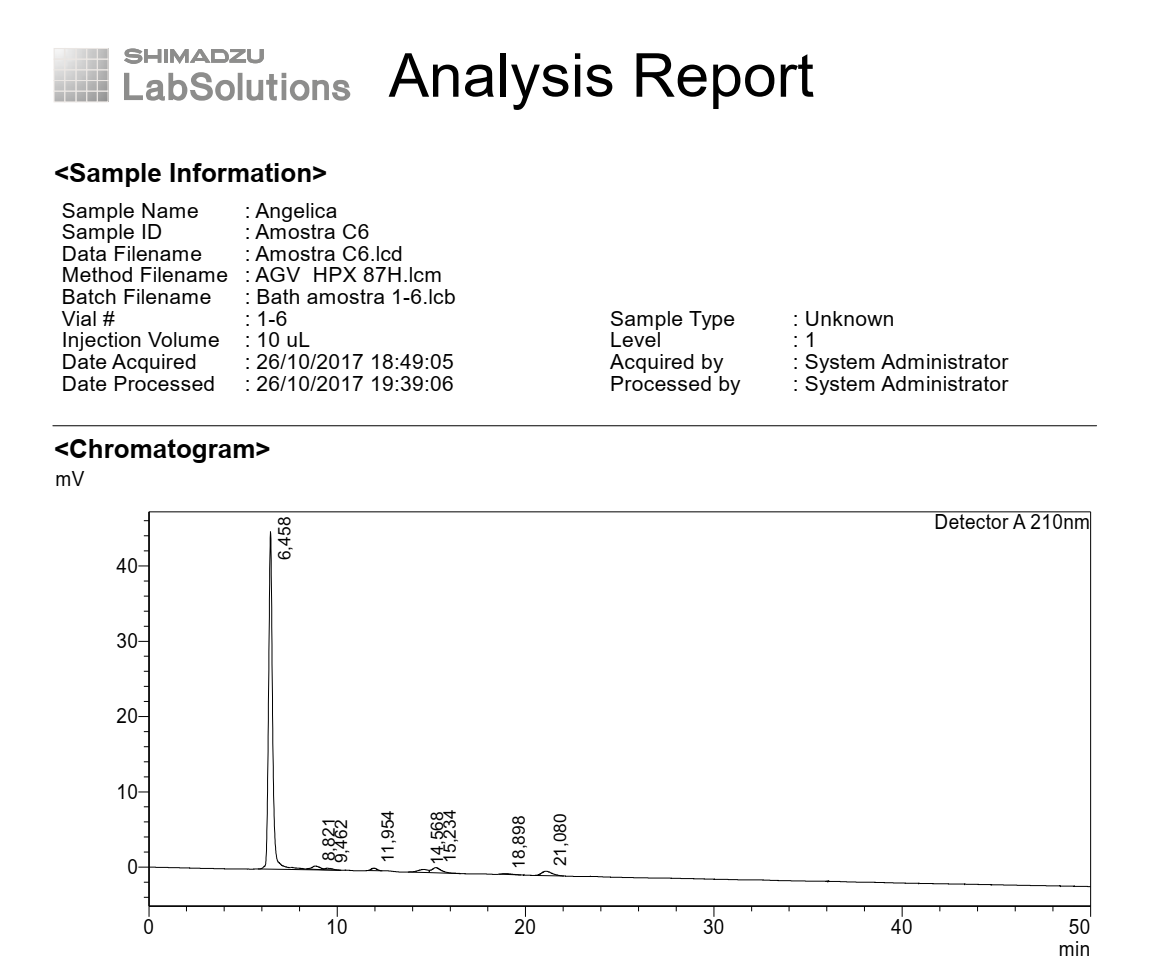


Citric

Acetic

Propionic

detected.

Figure S2: The chromatogram refers to one of the replicates obtained after fermentation of the fungus *Pochonia chlamydosporia* (Pc-10) for three days.
